# Supplementary material
Source: PubMed Central journal article supplement (PMC2946209)

**Fig. S1**

**A.**

**MCF10A (MI)**

**MCF10ATk1.c12 (MII)**

**MCF10CA1h (MIII)**

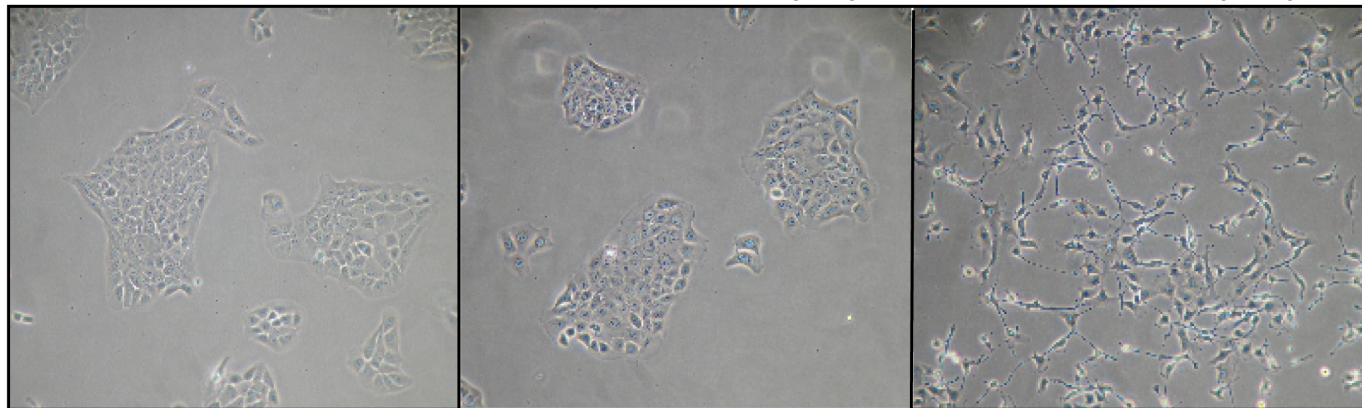

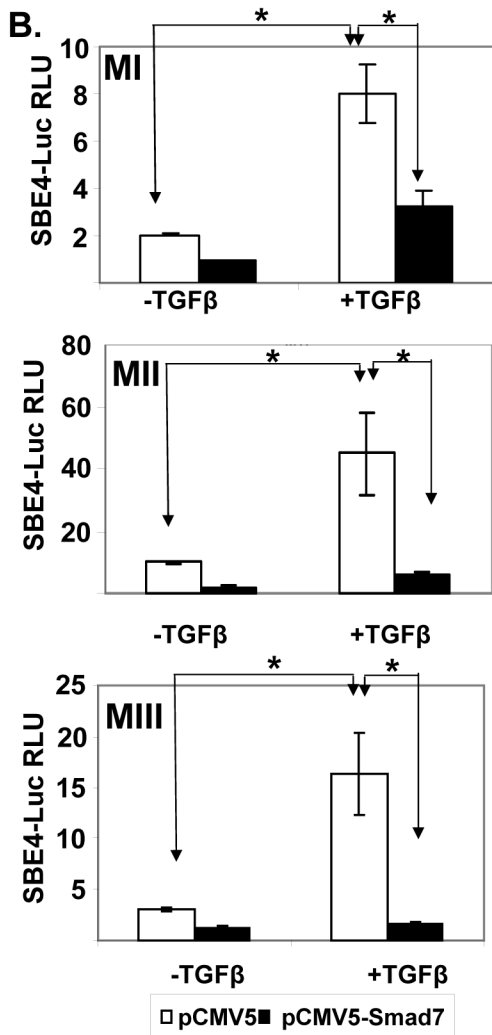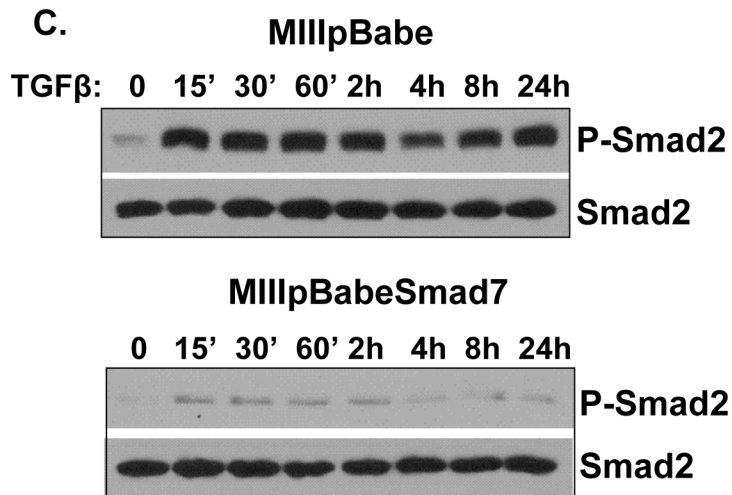

Fig. S2

**MIII pBabe DNA promoter clone#7:**

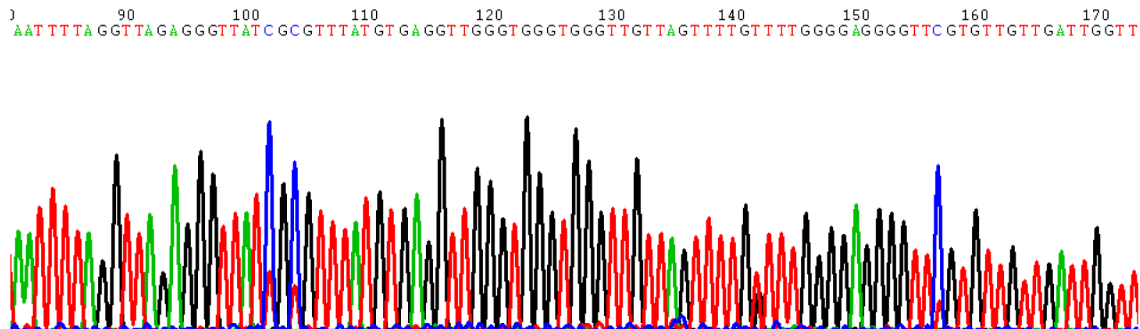

**MIII pBabe DNA promoter clone#8:**

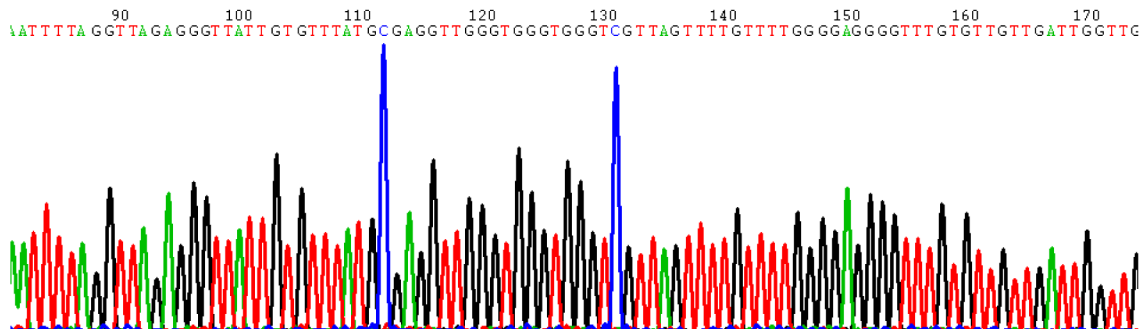

## MIII pBabe-Smad7 DNA promoter clone#1:

80 90 100 110 120 130 140 150 160 170  
TA GATTTTA GTAAATTTA GGTTA GAGGGTTATT GTGTTTAT GTGAGGTTGGGTGGGTGGGTTGTTAGTTTTGTTTTGGGGA GGGGTTTGTGTTGTTGATTGGTT

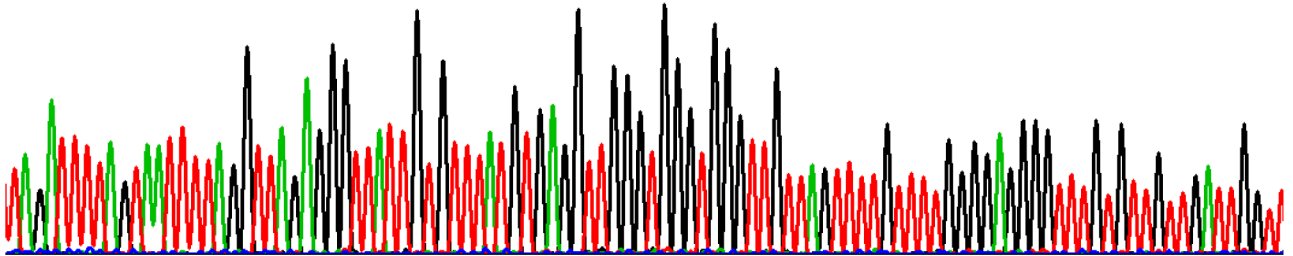

## MIII pBabe-Smad7 DNA promoter clone#5:

70 80 90 100 110 120 130 140 150 160 170  
TTTAA GATTTTA GTAAATTTA GGTTA GAGGGTTATT GTGTTTAT GTGAGGTTGGGTGGGTGGGTTGTTAGTTTTGTTTTGGGGA GGGGTTTGTGTTGTTGATTGGTT

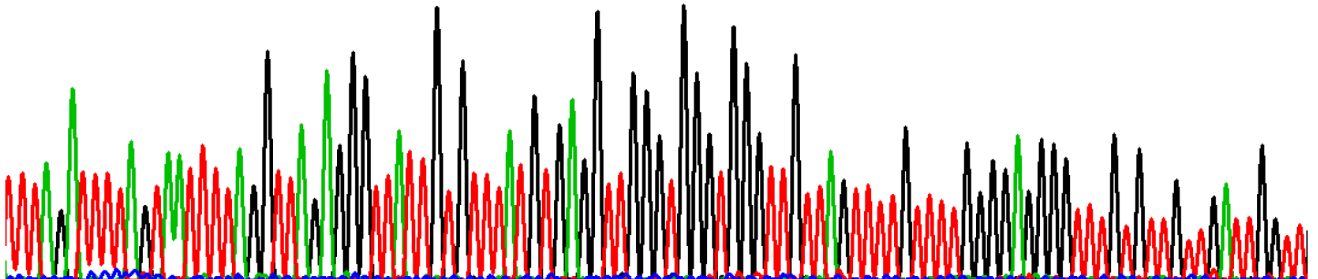

**Fig. S3**

**A. MIII pBabe**

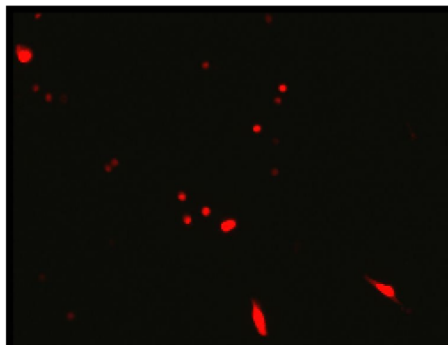

**MIII pBabe-Smad7**

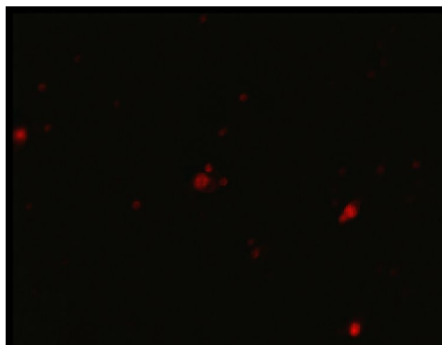

**B. MIII pBabe**

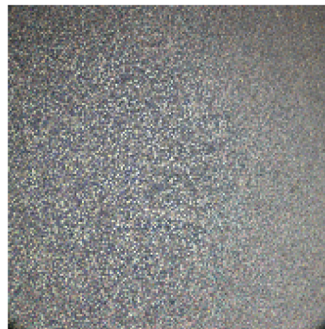

**MIII pBabeSmad7**

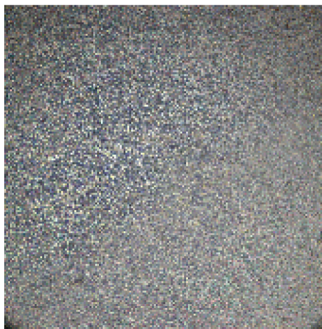

**Serum-free**

**MIII pBabe**

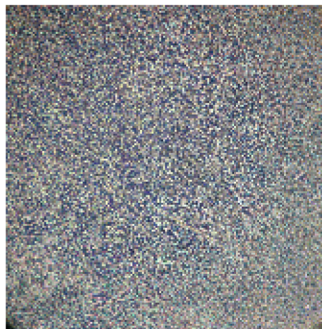

**MIII pBabeSmad7**

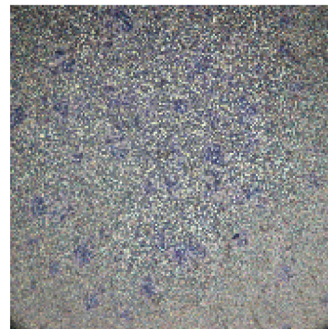

**10%FBS**

**Fig. S4 A. I****MllpB****MlllpB****MlllpBS7**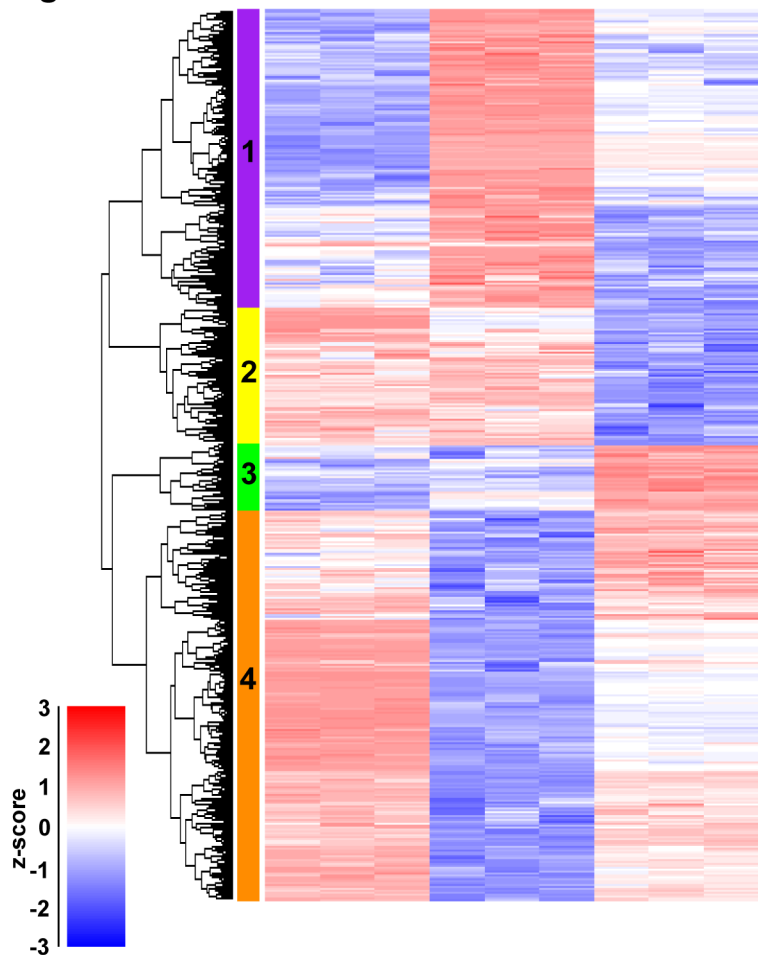**II.****MllpB****MlllpB****MlllpBS7**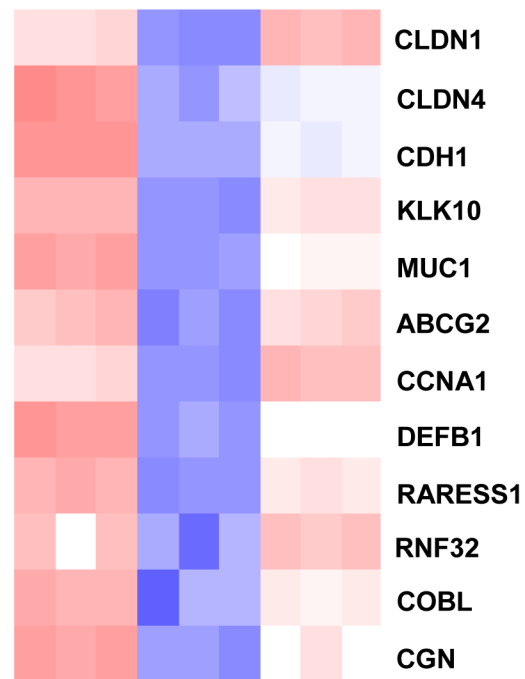

Fig. S5

A.

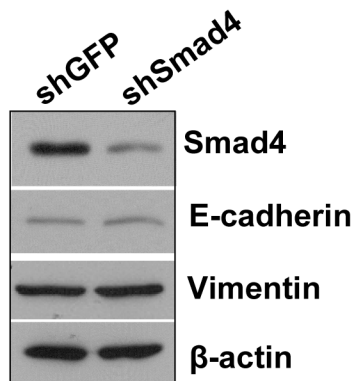

B.

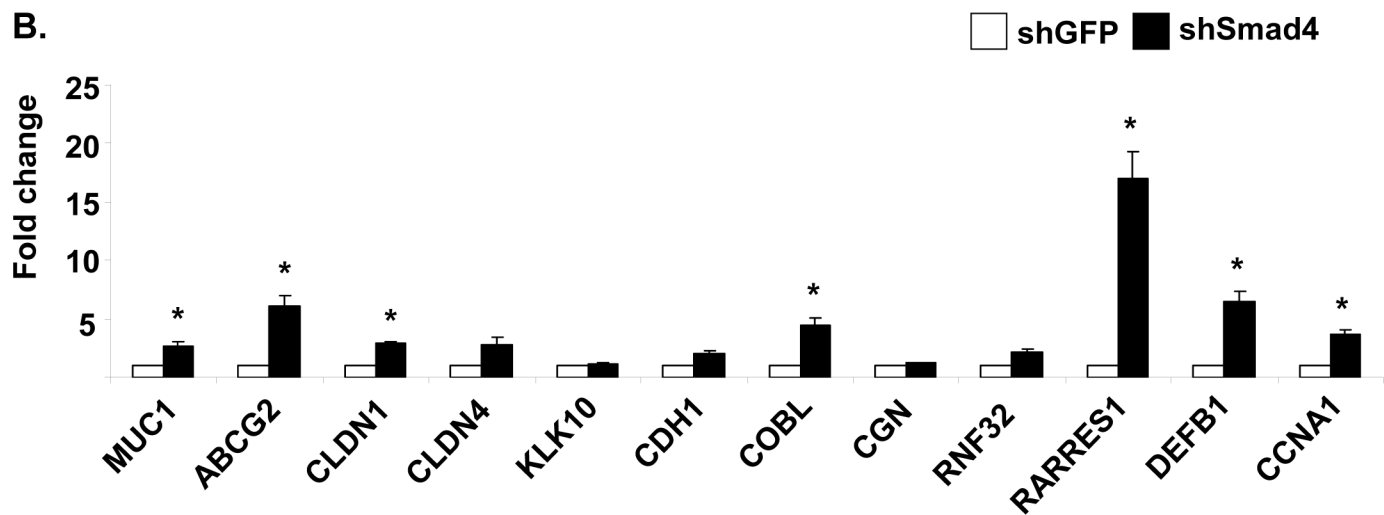

**C.**    **shGFP**

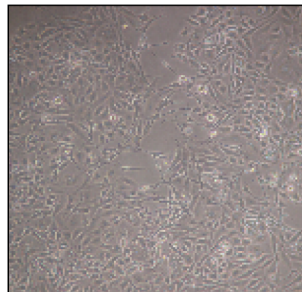

**shSmad2**

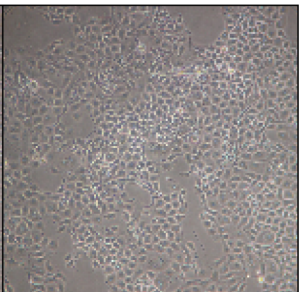

**shGFP**

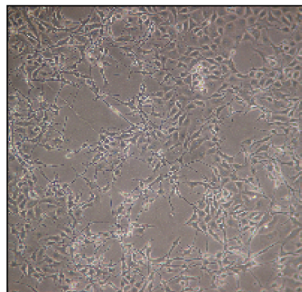

**shSmad4**

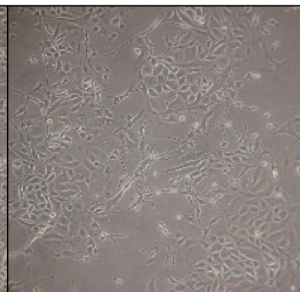



Fig. S6

A.

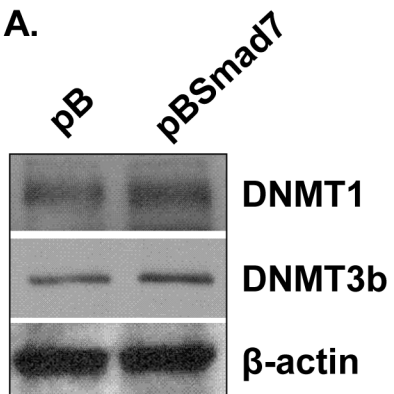

B.

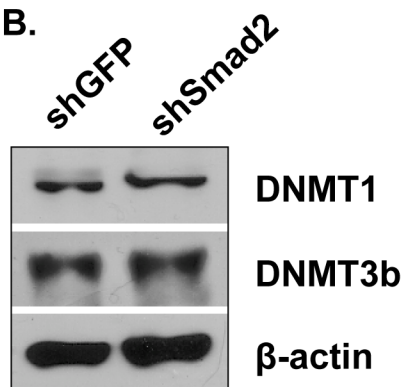



Fig. S8 A.

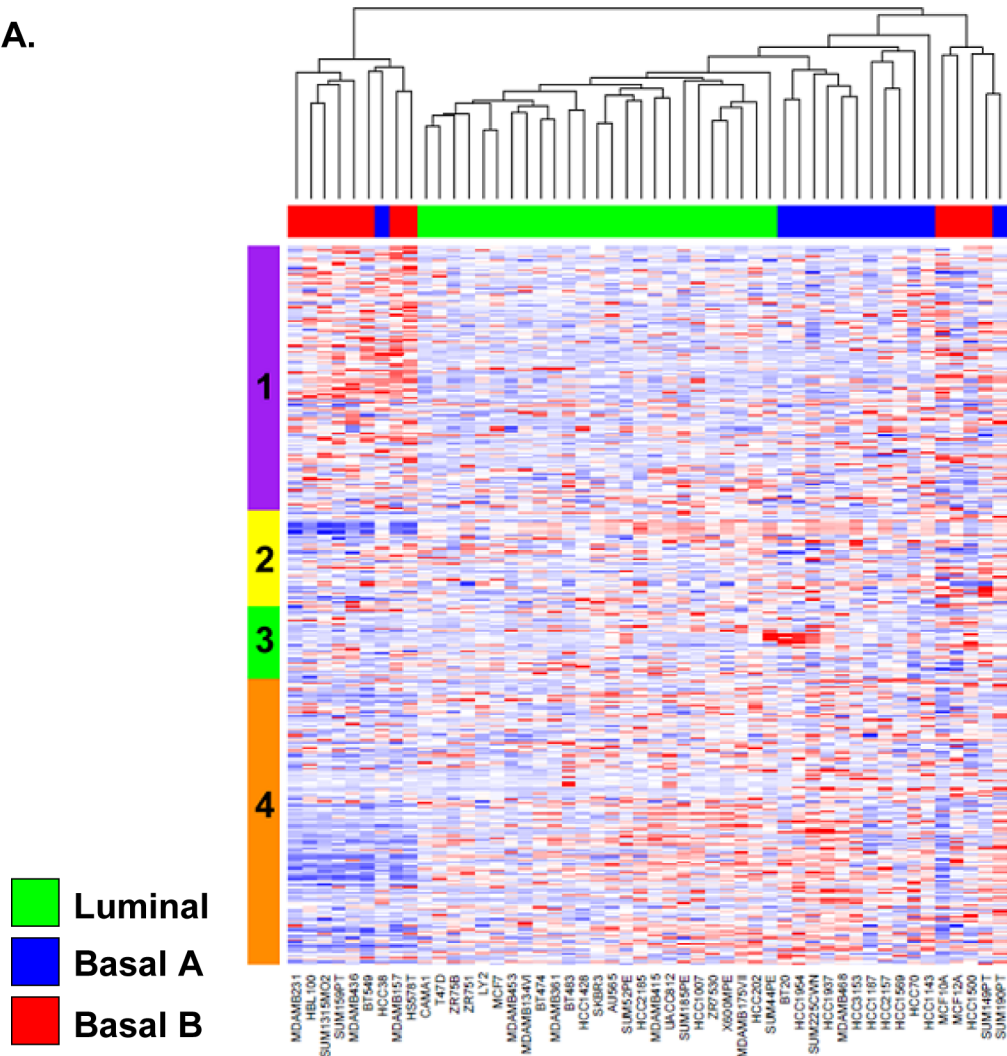



**Fig. S9**

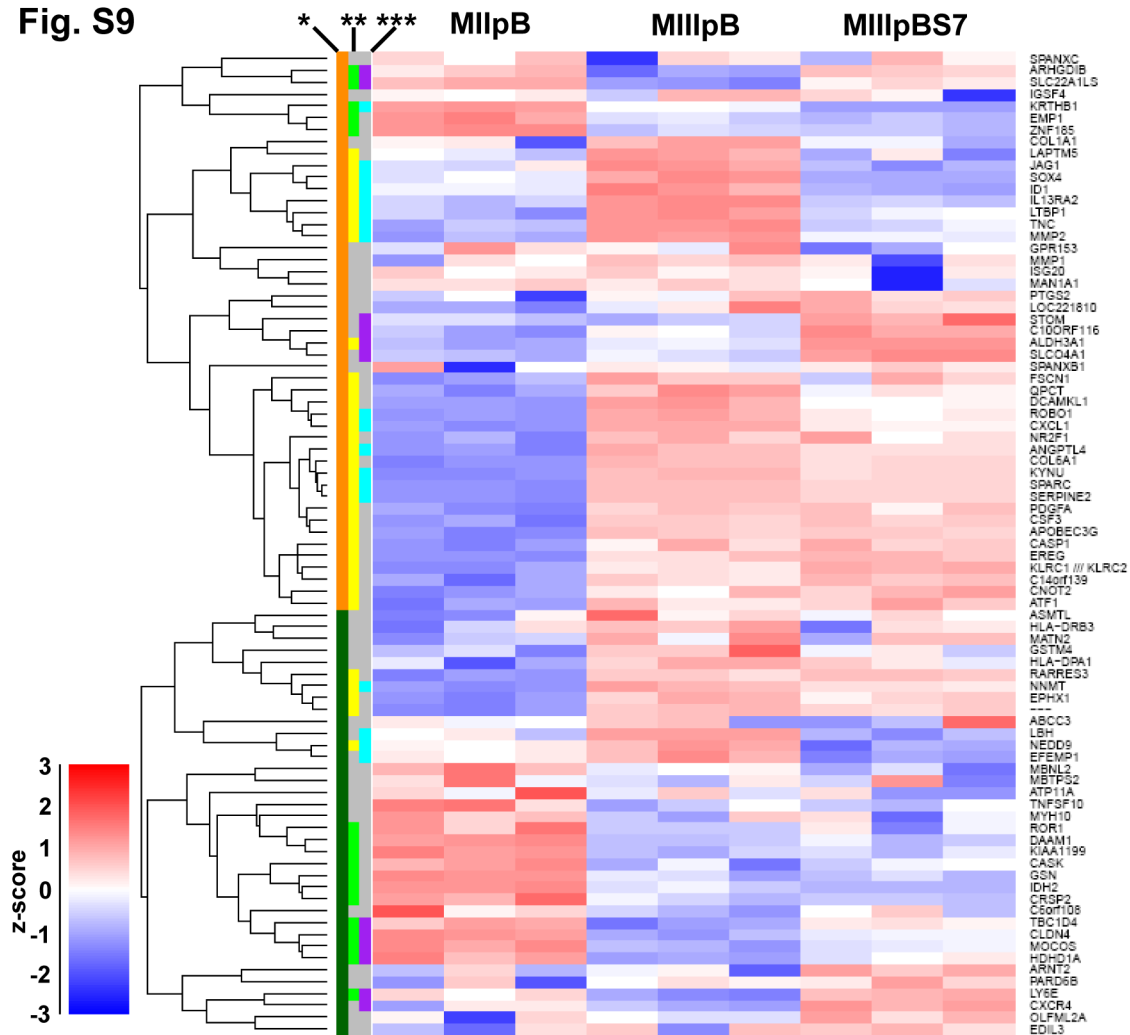

Supplement: NIHMS162824-supplement-2.pdf [file NIHMS162824-supplement-2.pdf]
